# Supplementary material for: Relationship of N6-Methyladenosine-Related lncRNAs With Tumor Microenvironment and Clinical Prognosis in Osteosarcoma
Source: Research Square preprint supplement (doi:10.21203/rs.3.rs-1206956/v1), 2022-01-17
Supplement: Supplementary file 1 [file a6d9787e5d1991b987f7825b.doc]

Table S1 GSEA analysis results including KEGG, Hallmark and GO in cluster2 VS cluster1

| NAME | Count | ES | NES | NOM p-val | FDR q-val |
| --- | --- | --- | --- | --- | --- |
| KEGG_PRIMARY_BILE_ACID_BIOSYNTHESIS | 16 | 0.6630946 | 1.9684149 | 0 | 0.26001433 |
| KEGG_MAPK_SIGNALING_PATHWAY | 267 | 0.37100318 | 1.6143396 | 0.04660194 | 0.7909317 |
| KEGG_STEROID_BIOSYNTHESIS | 17 | -0.70933414 | -1.891061 | 0.005780347 | 0.7170905 |
| KEGG_HEDGEHOG_SIGNALING_PATHWAY | 56 | -0.47533068 | -1.8116295 | 0.010224949 | 0.6486386 |
| KEGG_PYRUVATE_METABOLISM | 40 | -0.49282673 | -1.7343986 | 0.027083334 | 0.6927168 |
| KEGG_PHENYLALANINE_METABOLISM | 18 | -0.57925594 | -1.7218428 | 0.012711864 | 0.554797 |
| KEGG_GLYOXYLATE_AND_DICARBOXYLATE_METABOLISM | 16 | -0.56273806 | -1.6741873 | 0.028 | 0.5670757 |
| HALLMARK_EPITHELIAL_MESENCHYMAL_TRANSITION | 200 | 0.708759 | 2.304295 | 0 | 0.006937866 |
| HALLMARK_APICAL_SURFACE | 44 | 0.613919 | 2.1867566 | 0 | 0.016829392 |
| HALLMARK_COAGULATION | 138 | 0.43000853 | 1.7421668 | 0.018181818 | 0.2725851 |
| HALLMARK_APICAL_JUNCTION | 200 | 0.41160667 | 1.7109419 | 0.026915114 | 0.23669627 |
| HALLMARK_HEDGEHOG_SIGNALING | 36 | 0.5151737 | 1.6754729 | 0.03522505 | 0.22373553 |
| GOCC_BASEMENT_MEMBRANE | 94 | 0.6331644 | 2.3228917 | 0 | 0.2909686 |
| GOCC_COLLAGEN_CONTAINING_EXTRACELLULAR_MATRIX | 423 | 0.5134351 | 2.223204 | 0 | 0.43925464 |
| GOMF_EXTRACELLULAR_MATRIX_STRUCTURAL_CONSTITUENT | 170 | 0.60511047 | 2.2143593 | 0 | 0.32501772 |
| GOBP_VITAMIN_BIOSYNTHETIC_PROCESS | 19 | 0.7240653 | 2.2055209 | 0 | 0.26511836 |
| GOBP_RESPONSE_TO_PROSTAGLANDIN | 30 | 0.687275 | 2.1861436 | 0 | 0.25784254 |
| GOBP_RESPONSE_TO_PROSTAGLANDIN_E | 23 | 0.68978506 | 2.1184955 | 0 | 0.42280287 |
| GOBP_ODONTOGENESIS_OF_DENTIN_CONTAINING_TOOTH | 84 | -0.54930127 | -2.1890645 | 0 | 1 |
| GOMF_RECEPTOR_SERINE_THREONINE_KINASE_BINDING | 27 | -0.6887375 | -2.1732805 | 0 | 0.6095621 |
| GOBP_NOTOCHORD_DEVELOPMENT | 17 | -0.73377174 | -2.099331 | 0 | 0.8662757 |
| GOBP_FOREBRAIN_GENERATION_OF_NEURONS | 56 | -0.5807173 | -2.0979242 | 0.002105263 | 0.66119796 |
| GOBP_DEVELOPMENTAL_INDUCTION | 32 | -0.6215571 | -2.0333874 | 0 | 0.9467797 |
| GOBP_NEGATIVE_REGULATION_OF_CELL_DIVISION | 17 | -0.67915285 | -2.005228 | 0 | 1 |
| GOBP_ESTABLISHMENT_OF_SPINDLE_ORIENTATION | 34 | -0.58994883 | -1.9952092 | 0.001984127 | 0.9428243 |
| GOBP_REPLACEMENT_OSSIFICATION | 27 | -0.67113817 | -1.9934276 | 0.001890359 | 0.83947986 |
| GOBP_ODONTOGENESIS | 123 | -0.46870074 | -1.9932307 | 0 | 0.74750006 |
